# Supplementary material
Source: PubMed Central journal article supplement (PMC6552418)
Supplement: supp_RA118.007040_142422_2_supp_310011_ppy1nw.pdf [file supp_RA118.007040_142422_2_supp_310011_ppy1nw.pdf]

Supporting information

For

High mobility group box 1 enables bacterial lipids to trigger receptor-interacting protein kinase 3 (RIPK3)-mediated necroptosis and apoptosis in mice

**Ran Meng<sup>1,2</sup>, Lan Gu<sup>1,3</sup>, Yanyan Lu<sup>1,3</sup>, Kai Zhao<sup>1,3</sup>, Jianfeng Wu<sup>4</sup>, Haichao Wang<sup>5</sup>,  
Jiahuai Han<sup>4</sup>, Yiting Tang<sup>1,5\*</sup> and Ben Lu<sup>1,2,5,7\*</sup>**

From the <sup>1</sup>Department of Hematology and Key Laboratory of non-resolving inflammation and tumor, The 3rd Xiangya Hospital, Central South University, Changsha, Hunan Province, 410000 P.R. China; <sup>2</sup>Postdoctoral Research Station of Clinical Medicine, the 3rd Xiangya Hospital, Central South University, Changsha, Hunan Province, 410000 P.R.China; <sup>3</sup>Key Laboratory of Medical Genetics, School of Biological Science and Technology, Central South University, Changsha, Hunan Province, 410000 P.R. China; <sup>3</sup>State Key Laboratory of Cellular Stress Biology, Innovation Center for Cell Signaling Network, School of Life Sciences, Xiamen University, Xiamen, Fujian 361005, China; <sup>4</sup>Department of Emergency Medicine, North Shore University Hospital, Northwell Health, 350 Community Drive, Manhasset, NY 11030, USA; <sup>5</sup>Department of Physiology, School of Basic Medical Science, Central South University, Changsha, Hunan Province, 410000, People's Republic of China. <sup>6</sup>Key Laboratory of Sepsis Translational Medicine of Hunan, Central South University, Changsha, Hunan Province, 410000 P.R. China; <sup>7</sup>Department of Pathophysiology, School of Basic Medical Science, Jinan University, Guangzhou, Guangdong Province, 510632 P.R. China

Running title: *HMGB1 orchestrates RIPK3-mediated cell death*

\*To whom correspondence should be addressed: Yiting Tang, M.D.; 168, Tongzipo Road, Department of Physiology, School of Basic Medical Science, Central South University, Changsha 410013, P. R. China; Telephone: 86-0731-88618214, fax: 0731-88921910, E-mail: 109356513@qq.com. Ben Lu, Ph.D., M.D.; 138, Tongzipo Road, Department of Hematology, the Third Xiangya Hospital, Central South University, Changsha 410013, P. R. China; Telephone: 86-0731-88618214, fax:0731-88921910, E-mail: xybenlu@csu.edu.cn

Supplemental information including:

Figure S1: HMGB1, Lipid IVa or Lipid A alone Failed to Trigger Necrosis or Apoptosis.

Figure S2: Endogenous HMGB1 Enables Microbial Lipids to Trigger Cytokines Release.

Figure S3: HMGB1 Enables Lipid A to Trigger Cytokines Release in Human Cells.

Figure S4: HMGB1+Lipid A Increase the mRNA Levels of Cytokines

Figure S5: Inhibition of Necroptosis attenuates HMGB1/Microbial Lipids-Induced Cytokines' Release.

Figure S6: Neutralization of HMGB1 Attenuates necrosis/apoptosis and Cytokines' Release *in vivo*.

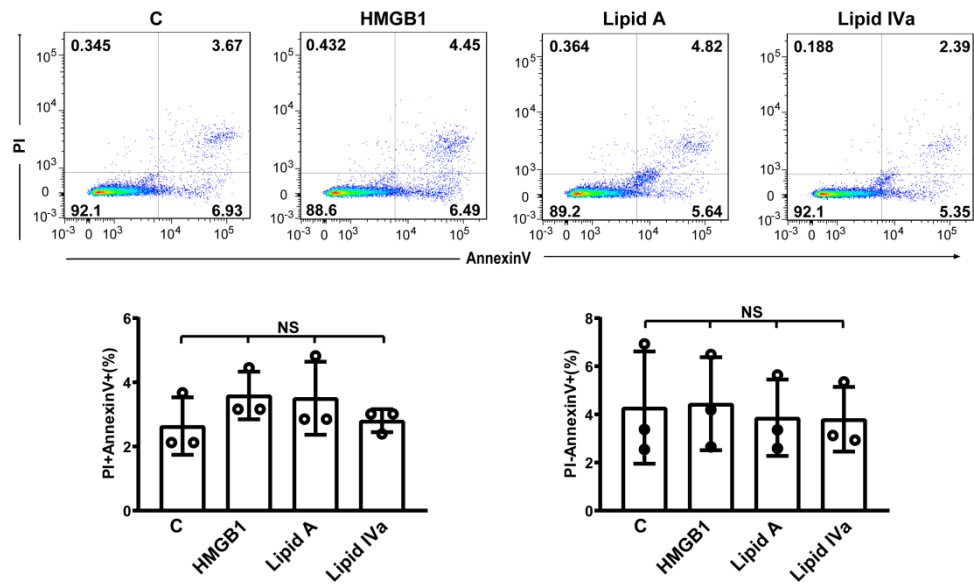

**Figure S1. HMGB1, Lipid IVa or Lipid A alone Failed to Trigger Necrosis or Apoptosis.** Flow cytometry analysis of WT peritoneal macrophages undergoing necrosis (PI+) or apoptosis (PI-) after stimulated with HMGB1 (0.4  $\mu$ g/ml), lipid IVa or lipid A (1  $\mu$ g/ml). NS, not significant. Results are presented as mean  $\pm$  SD.

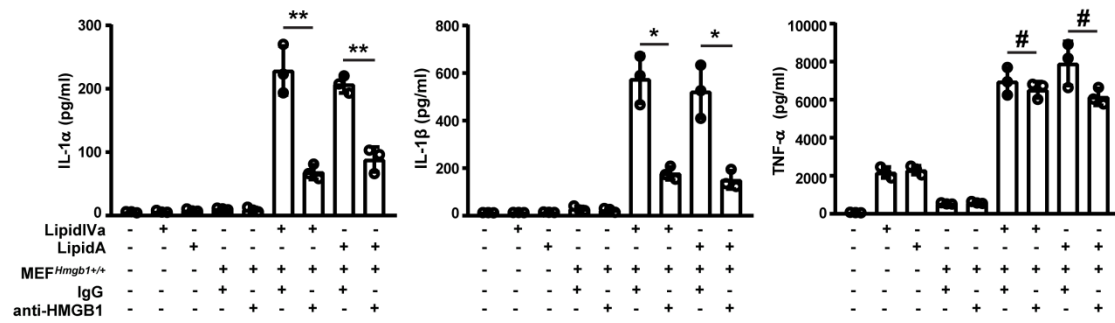

**Figure S2. Endogenous HMGB1 Enables Microbial Lipids to Trigger Cytokines Release.**

Necrotic lysate of *Hmgb1*<sup>+/+</sup> MEFs were pretreated with HMGB1 neutralizing antibody or isotype IgG controls. IL-1 $\alpha$ , IL-1 $\beta$  and TNF- $\alpha$  measured from culture supernatants of peritoneal macrophages from WT upon exposure to the anti-HMGB1 or isotype IgG pretreated necrotic *Hmgb1*<sup>+/+</sup> MEF in the presence or the absence of lipid IVa or lipid A (1  $\mu$ g/ml). \*P<0.05; \*\*P<0.01; #, not significant. Results are presented as mean  $\pm$ SD.

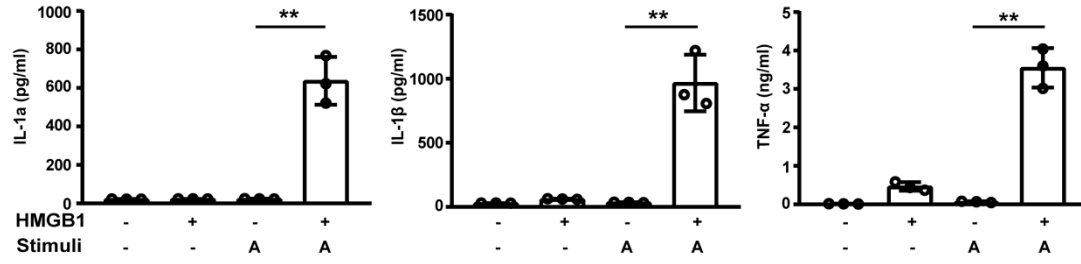

**Figure S3. HMGB1 Enables Lipid A to Trigger Cytokines Release in Human Cells.**

Total PBMCs were isolated from healthy peripheral blood by Ficoll. IL-1 $\alpha$ , IL-1 $\beta$  and TNF- $\alpha$  measured from culture supernatants of PBMC following stimulated with lipid A (1  $\mu$ g/ml) in the absence or the presence of HMGB1 (0.4  $\mu$ g/ml). \*\*P<0.01. Results are presented as mean  $\pm$ SD.

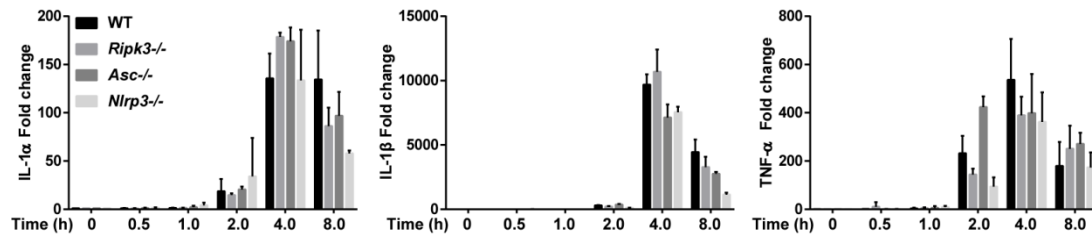

**Figure S4. HMGB1+Lipid A increase the mRNA levels of cytokines**

The mRNA levels of IL-1 $\alpha$ , IL-1 $\beta$  and TNF- $\alpha$  in WT peritoneal macrophages measured by quantitative real-time PCR analysis after stimulated with HMGB1 + Lipid A. Quantitative real-time PCR fold change values for target genes were normalized against the level of  $\beta$ -actin. Results are presented as mean  $\pm$  SD.

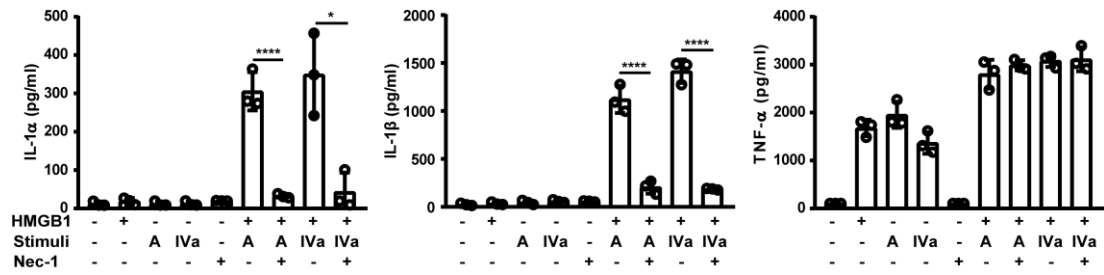

**Figure S5. Inhibition of Necroptosis attenuates HMGB1/Microbial Lipids-Induced Cytokines' release.**

IL-1 $\alpha$ , IL-1 $\beta$  and TNF- $\alpha$  measured from culture supernatants of peritoneal macrophages from WT mice stimulated with HMGB1+lipid IVa/A in the absence or the presence of necrostatin-1.

\*P < 0.05; \*\*\*\*P < 0.0001. Results are presented as mean  $\pm$  SD.

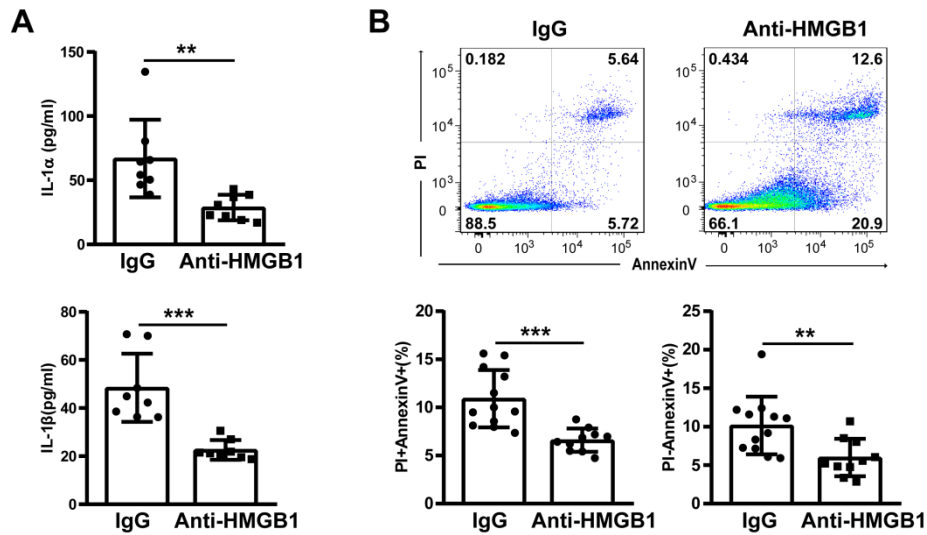

**Figure S6. Neutralization of HMGB1 Attenuates necrosis/apoptosis and Cytokines' Release *in vivo*.**

Air-pouch inflammatory infiltration was induced in the absence or presence of HMGB1-neutralizing or normal control IgGs. Then air-pouch lavage fluid was collected. Levels of IL-1 $\alpha$  and IL-1 $\beta$  were measured by ELISA analysis (A), necroptosis and apoptosis were measured by flow cytometry (B). \*\*P<0.01; \*\*\*P<0.001. Results are presented as mean  $\pm$  SD.
